# Supplementary material for: Forth–back oscillated charge carrier motion in dynamically disordered hexathienocoronene molecules: a theoretical study
Source: Royal Society of Chemistry journal article supplement (doi:10.1039/c5cp02189h), 2015-01-01
Supplement: c5cp02189h1.pdf [file c5cp02189h1.pdf]

## Supporting Information

### **Forth-Back Oscillated Charge Carrier Motion in Dynamically Disordered Hexathienocoronene molecules: A Theoretical Study**

K. Navamani and K. Senthilkumar\*

Department of Physics, Bharathiar University, Coimbatore-641 046

\*Corresponding author: [ksenthil@buc.edu.in](mailto:ksenthil@buc.edu.in)

**Fig. S1** Optimized structures of unsubstituted hexathienocoronene (HTC-a), hexyl substituted hexathienocoronene (HTC-b), ethyl substituted hexathienocoronene (HTC-c) molecules

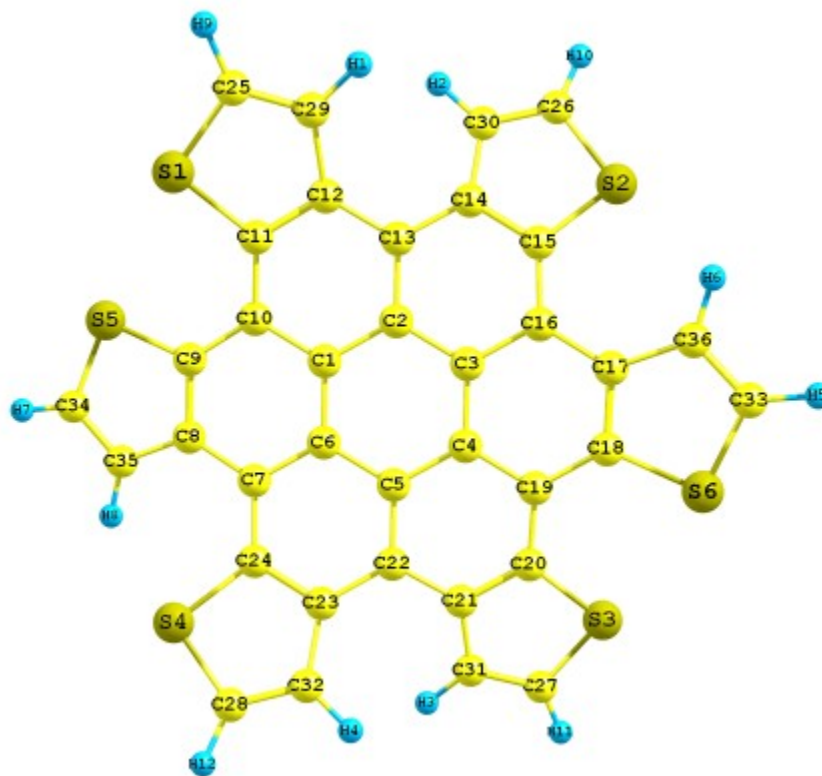

**HTC-a**

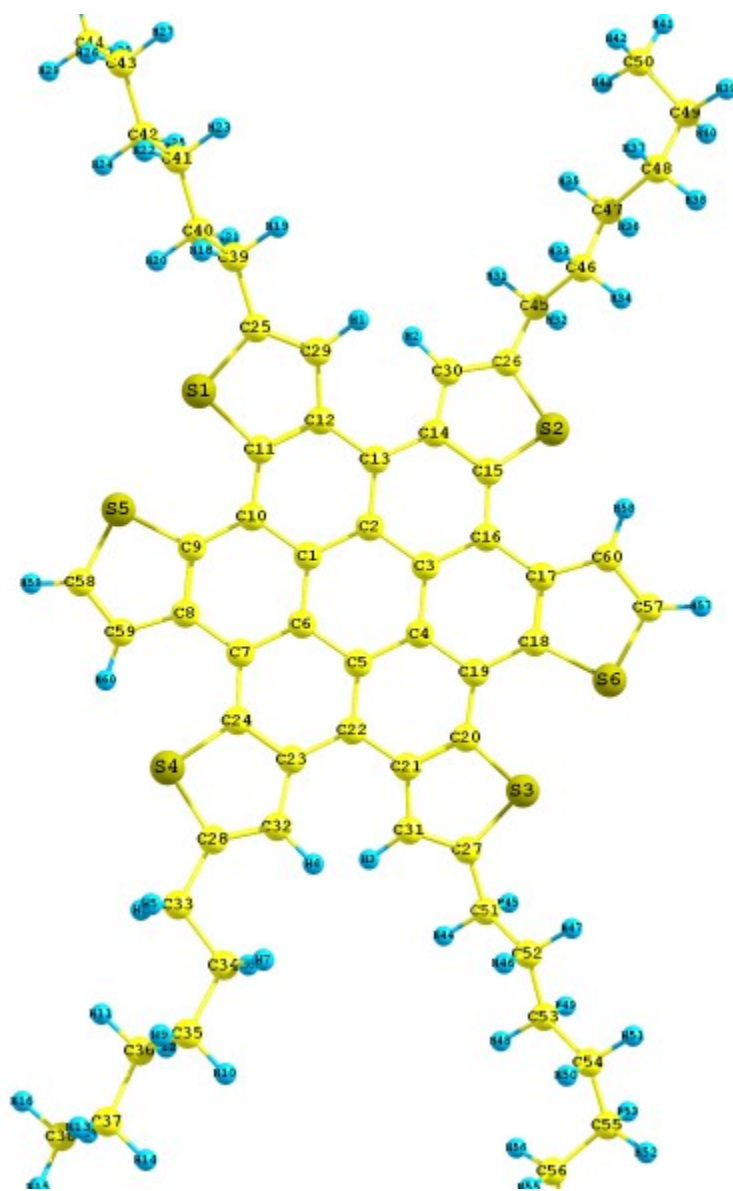

HTC-b

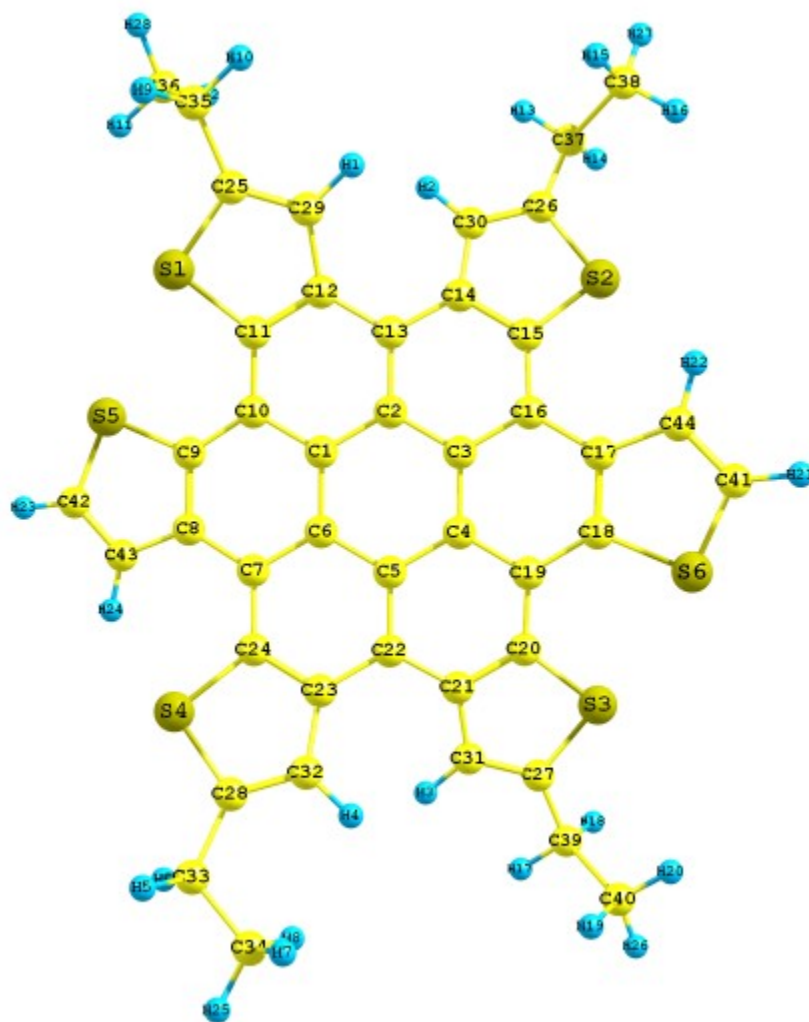

HTC-c

**Fig. S2** The density plot of Highest Occupied Molecular Orbital (HOMO) of the studied molecules HTC-a, HTC-b and HTC-c

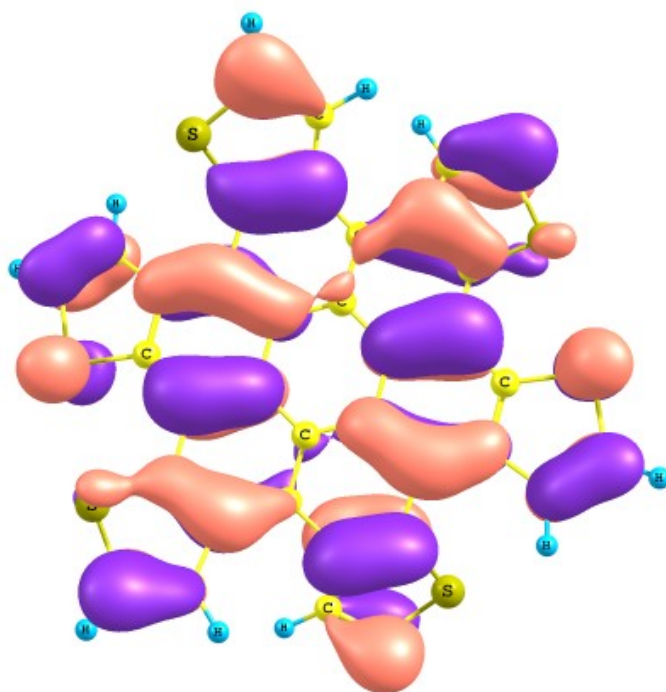

HTC-a

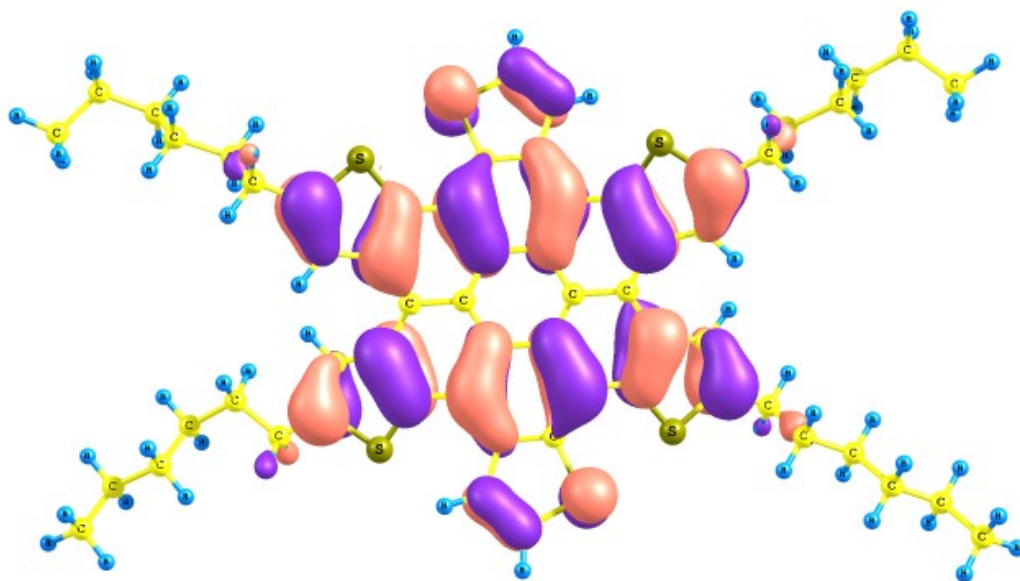

HTC-b

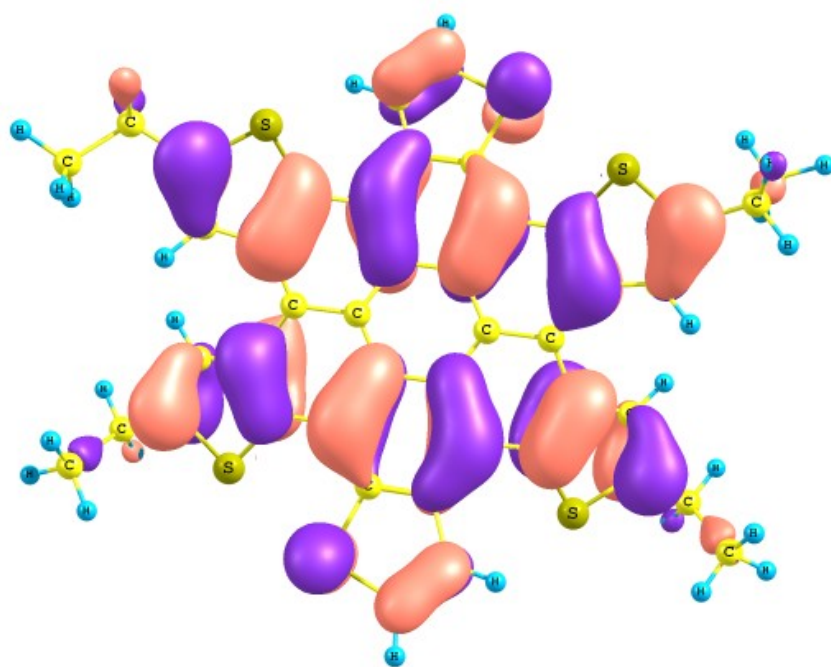

HTC-c

**Fig. S3** The density plot of Lowest Unoccupied Molecular Orbital (LUMO) of the studied molecules HTC-a, HTC-b and HTC-c

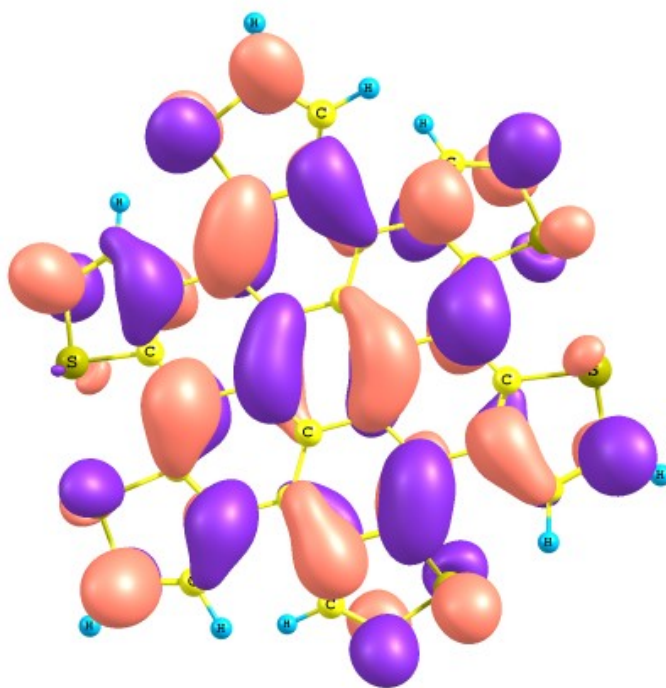

HTC-a

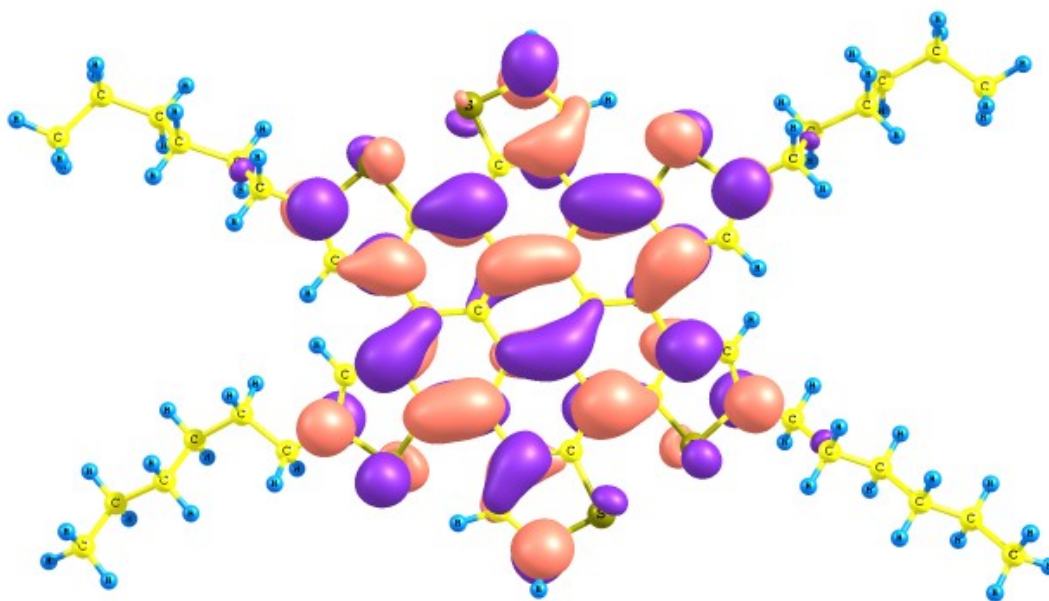

HTC-b

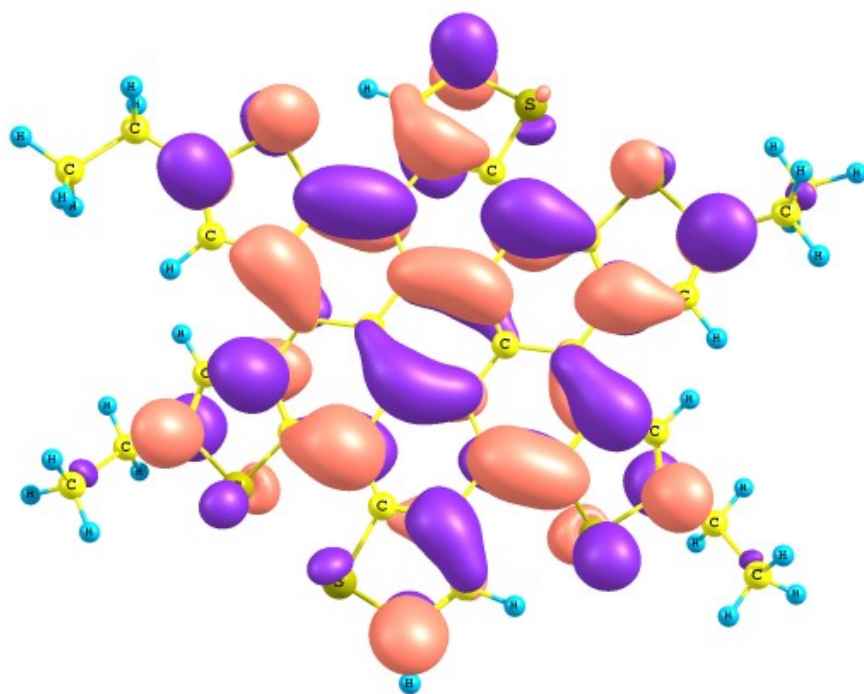

HTC-c



**Fig. S4** The plot between the number of occurrence, potential energy with respect to stacking angle calculation from molecular dynamics simulation for unsubstituted HTC (HTC-a) molecule

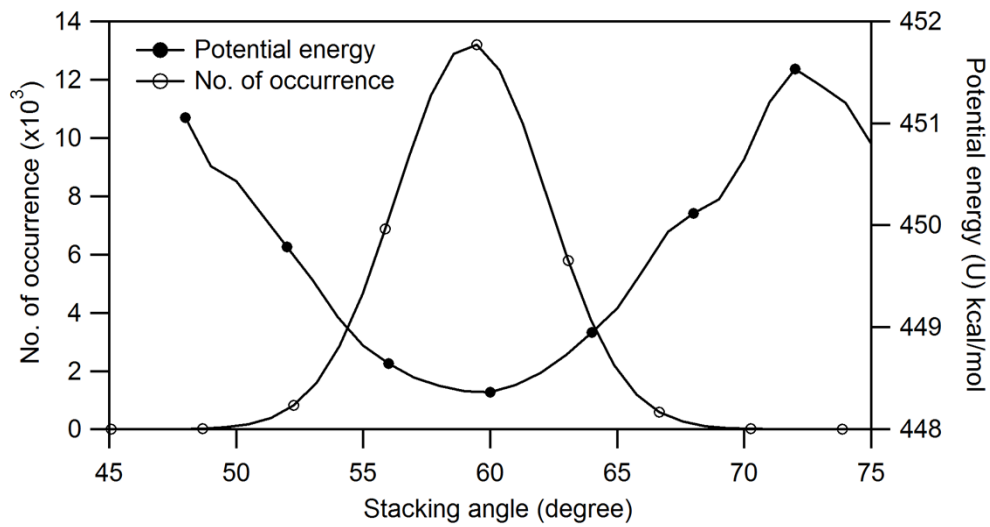

**Table S1.** The effective charge transfer integral ( $J_{eff}$ ) at different stacking angle ( $\theta$ ) for hole and electron transport in the studied HTC-a, HTC-b and HTC-c molecules.

| Stacking angle ( $\theta$ ) in degree | $J_{eff}$ in eV |       |       |          |        |       |
|---------------------------------------|-----------------|-------|-------|----------|--------|-------|
|                                       | Hole            |       |       | Electron |        |       |
|                                       | HTC-a           | HTC-b | HTC-c | HTC-a    | HTC-b  | HTC-c |
| 0                                     | 0.306           | 0.261 | 0.267 | 0.30     | 0.282  | 0.280 |
| 10                                    | 0.226           | 0.194 | 0.20  | 0.185    | 0.181  | 0.175 |
| 20                                    | 0.073           | 0.049 | 0.056 | 0.003    | 0.0002 | 0.009 |
| 30                                    | 0.091           | 0.122 | 0.109 | 0.129    | 0.133  | 0.148 |
| 40                                    | 0.315           | 0.332 | 0.325 | 0.209    | 0.193  | 0.236 |
| 50                                    | 0.485           | 0.477 | 0.481 | 0.085    | 0.263  | 0.10  |
| 60                                    | 0.325           | 0.324 | 0.322 | 0.277    | 0.378  | 0.317 |
| 70                                    | 0.017           | 0.030 | 0.018 | 0.413    | 0.434  | 0.416 |
| 80                                    | 0.196           | 0.193 | 0.198 | 0.225    | 0.228  | 0.208 |
| 90                                    | 0.169           | 0.173 | 0.171 | 0.001    | 0.013  | 0.011 |

**Table S2.** The number of forward ( $N_f$ ) and backward ( $N_b$ ) oscillations and their probabilities ( $P_f$  and  $P_b$ ), effective displacement ( $d_{eff}$ ) and average site energy difference  $\langle \Delta \varepsilon_{ij} \rangle$  for forward and backward motions calculated from kinetic Monte Carlo simulations

| Molecules | Hole  |       |       |       |                |                                                 |          | Electron |       |       |       |                |                                                 |          |
|-----------|-------|-------|-------|-------|----------------|-------------------------------------------------|----------|----------|-------|-------|-------|----------------|-------------------------------------------------|----------|
|           | $N_f$ | $N_b$ | $P_f$ | $P_b$ | $d_{eff}$ in Å | $\langle \Delta \varepsilon_{ij} \rangle$ in eV |          | $N_f$    | $N_b$ | $P_f$ | $P_b$ | $d_{eff}$ in Å | $\langle \Delta \varepsilon_{ij} \rangle$ in eV |          |
|           |       |       |       |       |                | Forward                                         | Backward |          |       |       |       |                | Forward                                         | Backward |
| HTC-a     | 0.98  | 0.85  | 0.54  | 0.46  | 0.27           | -0.005                                          | 0.005    | 1        | 0.73  | 0.57  | 0.43  | 0.47           | -0.007                                          | 0.007    |
| HTC-b     | 1.14  | 0.84  | 0.58  | 0.42  | 0.54           | -0.014                                          | 0.014    | 1.37     | 0.87  | 0.61  | 0.39  | 0.74           | -0.02                                           | 0.02     |
| HTC-c     | 2.36  | 0.72  | 0.76  | 0.23  | 1.79           | -0.054                                          | 0.054    | 4.91     | 0.47  | 0.91  | 0.09  | 2.76           | -0.13                                           | 0.13     |
